# Supplementary material for: Facilitators and barriers to using telepresence robots in aged care settings: a scoping review protocol
Source: HighWire-hosted journal article supplement (doi:10.1136/bmjopen-2021-051769), 2021-09-01
Supplement: bmjopen-2021-051769supp001_data_supplement.pdf [file bmjopen-2021-051769supp001_data_supplement.pdf]

### Supplementary file 1: Search strategy

We will work with a librarian at the university to refine the search strategy to ensure key articles are captured. Here is the plan.

We will apply the 3-step approach as outlined in the Joanna Briggs Institute Scoping Review Guideline.

**Step 1:** The initial search includes two online databases relevant to the topic: Ovid MEDLINE & CINAHL.

An example of the search in Ovid MEDLINE:

| #  | Searches                                    | Results |
|----|---------------------------------------------|---------|
| S1 | telepresence adj3 robot                     | 88      |
| S2 | (giraff or temi or VGo or Double) and robot | 805     |
| S3 | S1 or S2                                    | 891     |
| S4 | Older or aged or elderly or senior          | 5752669 |
| S5 | S3 AND S4                                   | 316     |

This initial search is then followed by an analysis of the text words contained in the title and abstract of retrieved papers, and of the index terms used to describe the articles.

**Step 2:** A second search using all identified keywords and index terms will then be undertaken across all selected databases: MEDLINE (Ovid), CINAHL, PsycINFO (EBSCO), Web of Science, and ProQuest Dissertations & Theses Global.

**2a)** Search terms and their combinations in step 2.

| Telepresence terms | Robot terms                 | Aged care terms |
|--------------------|-----------------------------|-----------------|
| Virtual care       | Robotic                     | Geriatrics      |
| Telemedicine       | Robot                       | Elderly         |
| Telehealth         | Bot                         | Gerontology     |
| Telecommunication  | automaton                   | Older adult     |
|                    | Technology assistive device | Senior          |
|                    |                             | Aged            |

**2b)** Google will be used to search grey literature (i.e., organizational reports, newsletters, and other articles not indexed in a library database).

**Step 3:** The resulting reference lists of all identified reports and articles will be searched for additional studies. Google Scholar will be used to find published articles, organizational reports and related articles. We will also conduct forward citation searching and related article searching in Google Scholar.
