# Supplementary material for: Facilitators and barriers to using telepresence robots in aged care settings: a scoping review protocol
Source: HighWire-hosted journal article supplement (doi:10.1136/bmjopen-2021-051769), 2021-09-01
Supplement: bmjopen-2021-051769supp002_data_supplement.pdf [file bmjopen-2021-051769supp002_data_supplement.pdf]

## **Supplementary file 2: Search techniques**

### **ADJn operator and truncation**

ADJn operator searches for papers where two terms are placed next to each other (in any order) within the distance of a specific number (n) of words. Truncation is a technique in which the root of a word is entered, followed by a truncation symbol (e.g., \*). This allows the search to include words with different endings (e.g., music\* = music, musical, musician, musicians).

### **Phrase searching**

Phrase searching utilizes double quotation marks around two or more words (e.g., “telepresence robot”) to retrieve results with an exact match of the phrase between the quotation marks, rather than searching a set of keywords in random order.
