# Supplementary material for: Facilitators and barriers to using telepresence robots in aged care settings: a scoping review protocol
Source: HighWire-hosted journal article supplement (doi:10.1136/bmjopen-2021-051769), 2021-09-01
Supplement: bmjopen-2021-051769supp003_data_supplement.pdf [file bmjopen-2021-051769supp003_data_supplement.pdf]

**Supplementary file 3: Data extraction instrument**

**Review title:** The use of telepresence robots to support social connections among older people in care settings: a scoping review protocol

**Review questions:**

1. What has been reported in the literature regarding the impact of telepresence robots in supporting social connections of older people living in care settings?
2. What strategies using telepresence robots for social connection in care settings were successful and what barriers and limitations have been reported?

**Inclusion criteria (PCC):**

Population – Individuals aged 60 and older living in care settings

Concept – telepresence robots, social connection, well being

Context – Care settings, e.g., hospitals, nursing homes, assisted living, etc.

**Exclusion criteria**

Studies with 'no concept of interest' e.g., review articles that focus on telepresence robots in home settings

**Study details and characteristics extraction:**

Author

Year

Country

Setting

Participant and sample size

**Results extraction:**

Type of intervention

Key findings/ Impact (e.g., benefits and users' experiences related to social connection, benefits for well-being)

Lessons learned (e.g., barriers to the use of telepresence robots and helpful strategies to overcome barriers)
